# Supplementary material for: Successful treatment with MEK‐inhibitor in a patient with NRAS ‐related cutaneous skeletal hypophosphatemia syndrome
Source: PubMed Central journal article supplement — Genes Chromosomes Cancer. 2022 Sep 19;61(12):740–6. doi: 10.1002/gcc.23092 (PMC9826313; doi:10.1002/gcc.23092), 2022-09-19
Supplement: GCC-61-740-s001.pdf [file GCC-61-740-s001.pdf]

**Supplemental Material 2 - Hypergeometric distribution of cores intersections.**

| Pathway                     | Gene Set                        | Gene Set Size | Gene Set Core<br>RAF1 Patient | Gene Set Core<br>NRAS Patient | Observed Core<br>Intersection | Expected Core<br>Intersection | Observed /<br>Expected Ratio | Hypergeometric P<br>value |
|-----------------------------|---------------------------------|---------------|-------------------------------|-------------------------------|-------------------------------|-------------------------------|------------------------------|---------------------------|
| <i>EGFR/RAS/MEX</i>         | <i>EGFR_UP.V1_UP</i>            | 192           | 50                            | 51                            | 25                            | 13,3                          | 1,88                         | 5,4E-06                   |
| <i>EGFR/RAS/MEX</i>         | <i>KRAS.300_UP.V1_UP</i>        | 142           | 14                            | 16                            | 9                             | 1,6                           | 5,71                         | 1,0E-08                   |
| <i>EGFR/RAS/MEX</i>         | <i>RAF_UP.V1_UP</i>             | 193           | 43                            | 39                            | 20                            | 8,7                           | 2,30                         | 8,9E-07                   |
| <i>EGFR/RAS/MEX</i>         | <i>KRAS.DF.V1_UP</i>            | 191           | 59                            | 54                            | 34                            | 16,7                          | 2,04                         | 6,3E-10                   |
| <i>Cell cycle</i>           | <i>ATF2_S_UP.V1_UP</i>          | 192           | 27                            | 29                            | 13                            | 4,1                           | 3,19                         | 7,9E-07                   |
| <i>Cell cycle</i>           | <i>ATF2_UP.V1_UP</i>            | 190           | 27                            | 25                            | 16                            | 3,6                           | 4,50                         | 7,8E-12                   |
| <i>Cell cycle</i>           | <i>CYCLIN_D1_UP.V1_UP</i>       | 187           | 35                            | 59                            | 27                            | 11,0                          | 2,45                         | 5,3E-11                   |
| <i>PI-3 kinase pathway</i>  | <i>AKT_UP.V1_UP</i>             | 169           | 53                            | 48                            | 34                            | 15,1                          | 2,26                         | 8,9E-13                   |
| <i>WNT pathway</i>          | <i>LEF1_UP.V1_UP</i>            | 194           | 43                            | 23                            | 13                            | 5,1                           | 2,55                         | 1,9E-05                   |
| <i>WNT pathway</i>          | <i>BCAT.100_UP.V1_UP</i>        | 49            | 12                            | 10                            | 8                             | 2,4                           | 3,27                         | 1,0E-06                   |
| <i>YAP/TAZ pathway</i>      | <i>CORDENONSI_YAP_CONSERVED</i> | 57            | 27                            | 16                            | 12                            | 7,6                           | 1,58                         | 1,6E-03                   |
| <i>PTPN11/SOS1/SHOC2 NS</i> | <i>NS_UP</i>                    | 48            | 16                            | 24                            | 15                            | 8,0                           | 1,88                         | 3,3E-07                   |
| <i>PTPN11 NS</i>            | <i>PTPN11_UP</i>                | 97            | 32                            | 26                            | 26                            | 8,6                           | 3,03                         | 0                         |
