# Supplementary material for: Successful treatment with MEK‐inhibitor in a patient with NRAS ‐related cutaneous skeletal hypophosphatemia syndrome
Source: PubMed Central journal article supplement — Genes Chromosomes Cancer. 2022 Sep 19;61(12):740–6. doi: 10.1002/gcc.23092 (PMC9826313; doi:10.1002/gcc.23092), 2022-09-19
Supplement: GCC-61-740-s002.pdf [file GCC-61-740-s002.pdf]

**Supplemental Material 1 - Results of GeneSet Enrichment Analysis (GSEA)[14] on C6 "Oncogenic signatures" and Noonan signature, [15] comparing different days of treatment vs pretreatment control. Previously identified NS signatures in peripheral blood mononuclear cells (PBMC) are highlighted in yellow. Previously identified trametinib-modulated gene sets are highlighted as follows: EGFR/RAS/MEK pathway gene sets: bold, red text; Cell cycle gene sets: bold, blue text; PI3Kinase pathway gene sets: bold, green text; WNT pathway gene sets: bold, purple text; YAP/TAZ gene set: bold, orange text.**

| GENE SET NAME                             | GSEA 1: 6vsC |        | GSEA 2: 19vsC |        | GSEA 3: 39vsC |          | GSEA 4: 95vsC |        | GSEA 5: 154vsC |        | GSEA 6: TvsC12r |        |
|-------------------------------------------|--------------|--------|---------------|--------|---------------|----------|---------------|--------|----------------|--------|-----------------|--------|
|                                           | FDR q-val    | NES    | FDR q-val     | NES    | FDR q-val     | NES      | FDR q-val     | NES    | FDR q-val      | NES    | FDR q-val       | NES    |
| <b>PTPN11_UP</b>                          | 0,0001       | -2,020 | 0,0000        | -2,138 | 0,0000        | -2,371   | 0,0000        | -2,667 | 0,0000         | -2,467 | 0,0000          | -2,502 |
| <b>SHOC2_UP</b>                           | 0,0000       | -2,654 | 0,0000        | -2,335 | 0,0620        | -1,431   | 0,0022        | -1,872 | 0,0000         | -2,308 | 0,0000          | -2,426 |
| RPS14_DN.V1_UP                            | 0,0042       | -1,787 | 0,0000        | -2,282 | 0,0109        | -1,716   | 0,0000        | -2,128 | 0,0000         | -2,304 | 0,0000          | -2,392 |
| <b>NS_UP</b>                              | 0,0029       | -1,822 | 0,0003        | -2,131 | 0,0049        | -1,923   | 0,0000        | -2,217 | 0,0000         | -2,218 | 0,0000          | -2,356 |
| CAHOY_ASTROGLIAL                          | 0,1344       | -1,327 | 0,0016        | -1,941 | 0,0299        | -1,576   | 0,0000        | -2,194 | 0,0000         | -2,120 | 0,0000          | -2,093 |
| KRAS.KIDNEY_UP.V1_DN                      | 0,0840       | -1,407 | 0,0269        | -1,595 | 0,0058        | -2,016   | 0,0000        | -2,005 | 0,0395         | -1,651 | 0,0034          | -1,922 |
| RAPA_EARLY_UP.V1_UP                       | 0,5668       | -0,987 | 0,0237        | -1,611 | 0,0219        | -1,632   | 0,0000        | -2,043 | 0,0139         | -1,753 | 0,0029          | -1,922 |
| ALK_DN.V1_UP                              | 0,0391       | -1,533 | 0,0200        | -1,675 | 0,0042        | -1,861   | 0,0000        | -2,215 | 0,0085         | -1,807 | 0,0026          | -1,909 |
| HOXA9_DN.V1_UP                            | 0,0055       | -1,762 | 0,0003        | -2,124 | 0,4237        | -1,048   | 0,0321        | -1,531 | 0,0032         | -1,855 | 0,0053          | -1,839 |
| <b>ATF2_S_UP.V1_UP</b>                    | 0,0075       | -1,734 | 0,0990        | -1,377 | 0,0171        | -1,670   | 0,0338        | -1,503 | 0,0382         | -1,661 | 0,0067          | -1,801 |
| IL15_UP.V1_DN                             | 0,1584       | -1,298 | 0,0014        | -1,939 | 0,3882        | -1,066   | 0,0217        | -1,601 | 0,0875         | -1,490 | 0,0071          | -1,782 |
| AKT_UP.MTOR_DN.V1_DN                      | 0,0735       | -1,429 | 0,0388        | -1,544 | 0,0922        | -1,342   | 0,0184        | -1,634 | 0,0493         | -1,581 | 0,0122          | -1,732 |
| E2F1_UP.V1_DN                             | 0,1179       | -1,351 | 0,0261        | -1,626 | 0,0811        | -1,373   | 0,0082        | -1,723 | 0,0392         | -1,631 | 0,0125          | -1,723 |
| SNF5_DN.V1_UP                             | 0,0019       | -1,870 | 0,0976        | -1,380 | 0,0362        | -1,527   | 0,0663        | -1,399 | 0,1519         | -1,341 | 0,0130          | -1,717 |
| KRAS.AMP.LUNG_UP.V1_UP                    | 0,1346       | -1,324 | 0,0109        | -1,777 | 0,0548        | -1,461   | 0,0091        | -1,706 | 0,0508         | -1,584 | 0,0130          | -1,713 |
| MTOR_UP.V1_UP                             | 0,0003       | -2,008 | 0,3016        | -1,140 | 0,0095        | -1,734   | 0,0358        | -1,487 | 0,0970         | -1,450 | 0,0150          | -1,692 |
| GCNP_SHH_UP.LATE.V1_DN                    | 0,9749       | -0,732 | 0,0245        | -1,623 | 0,0067        | -1,829   | 0,0084        | -1,732 | 0,2114         | -1,254 | 0,0184          | -1,668 |
| WNT_UP.V1_UP                              | 0,5356       | -1,009 | 0,1414        | -1,303 | 0,0080        | -1,775   | 0,0084        | -1,718 | 0,0845         | -1,506 | 0,0200          | -1,656 |
| <b>LEF1_UP.V1_UP</b>                      | 0,4030       | -1,107 | 0,0499        | -1,503 | 0,0510        | -1,486   | 0,0063        | -1,794 | 0,0372         | -1,648 | 0,0212          | -1,650 |
| <b>ATF2_UP.V1_UP</b>                      | 0,0156       | -1,659 | 0,2434        | -1,198 | 0,0050        | -1,897   | 0,0318        | -1,537 | 0,1302         | -1,374 | 0,0202          | -1,650 |
| AKT_UP.V1_UP                              | 0,0214       | -1,614 | 0,2809        | -1,164 | 0,0309        | -1,553   | 0,0166        | -1,652 | 0,0978         | -1,428 | 0,0193          | -1,649 |
| ESC_J1_UP.EARLY.V1_DN                     | 0,0701       | -1,438 | 0,1375        | -1,314 | 0,0172        | -1,664   | 0,0195        | -1,621 | 0,0888         | -1,484 | 0,0195          | -1,646 |
| LEF1_UP.V1_UP                             | 0,4053       | -1,108 | 0,0467        | -1,514 | 0,0548        | -1,464   | 0,0065        | -1,801 | 0,0375         | -1,620 | 0,0204          | -1,637 |
| <b>KRAS.DF.V1_UP</b>                      | 0,0167       | -1,648 | 0,0161        | -1,724 | 0,4925        | -1,018   | 0,0188        | -1,635 | 0,0833         | -1,482 | 0,0213          | -1,628 |
| AKT_UP.V1_UP                              | 0,0201       | -1,628 | 0,2654        | -1,176 | 0,0310        | -1,556   | 0,0193        | -1,625 | 0,0982         | -1,422 | 0,0216          | -1,622 |
| CYCLIN_D1_KE.V1_UP                        | 0,0977       | -1,387 | 0,6305        | -0,943 | 0,0055        | -1,845   | 0,0072        | -1,764 | 0,1560         | -1,321 | 0,0255          | -1,605 |
| MEK_UP.V1_UP                              | 0,5106       | -1,029 | 0,0797        | -1,431 | 0,0367        | -1,529   | 0,0081        | -1,738 | 0,1896         | -1,273 | 0,0283          | -1,591 |
| KRAS.BREAST_UP.V1_DN                      | 0,3120       | -1,161 | 0,0187        | -1,697 | 0,1646        | -1,237   | 0,0070        | -1,780 | 0,0383         | -1,625 | 0,0286          | -1,588 |
| <b>CYCLIN_D1_UP.V1_UP</b>                 | 0,5521       | -0,998 | 0,3457        | -1,107 | 0,0060        | -1,959   | 0,0000        | -2,096 | 0,1548         | -1,334 | 0,0290          | -1,585 |
| CYCLIN_D1_UP.V1_UP                        | 0,5811       | -0,980 | 0,3159        | -1,131 | 0,0067        | -1,963   | 0,0000        | -2,101 | 0,1422         | -1,357 | 0,0318          | -1,571 |
| CRX_NRL_DN.V1_DN                          | 0,7118       | -0,918 | 0,0249        | -1,626 | 0,1869        | -1,215   | 0,0670        | -1,395 | 0,0997         | -1,451 | 0,0321          | -1,566 |
| CAHOY_ASTROCYTIC                          | 0,2452       | -1,218 | 0,0867        | -1,411 | 0,0831        | -1,363   | 0,0600        | -1,412 | 0,0805         | -1,515 | 0,0344          | -1,558 |
| JNK_DN.V1_DN                              | 0,0806       | -1,413 | 0,2626        | -1,181 | 0,0078        | -1,770   | 0,0308        | -1,521 | 0,0862         | -1,470 | 0,0350          | -1,554 |
| P53_DN.V1_DN                              | 0,0490       | -1,493 | 0,1067        | -1,358 | 0,0559        | -1,464   | 0,0319        | -1,526 | 0,1002         | -1,428 | 0,0367          | -1,546 |
| NOTCH_DN.V1_DN                            | 0,0748       | -1,429 | 0,0236        | -1,621 | 0,0941        | -1,330   | 0,0311        | -1,536 | 0,1550         | -1,324 | 0,0367          | -1,543 |
| IL21_UP.V1_UP                             | 0,7755       | 0,964  | 0,1440        | -1,306 | 0,0235        | -1,621   | 0,0080        | -1,731 | 0,0826         | -1,504 | 0,0389          | -1,532 |
| ESC_V6.5_UP.EARLY.V1_DN                   | 0,1334       | -1,330 | 0,1209        | -1,336 | 0,0907        | -1,339   | 0,0073        | -1,760 | 0,1393         | -1,356 | 0,0382          | -1,531 |
| KRAS.AMP.LUNG_UP.V1_DN                    | 0,4370       | -1,074 | 0,0229        | -1,621 | 0,0919        | -1,339   | 0,0287        | -1,551 | 0,0355         | -1,646 | 0,0384          | -1,528 |
| PRC2_SUZ12_UP.V1_DN                       | 0,1390       | -1,316 | 0,1852        | -1,243 | 0,0366        | -1,532   | 0,0659        | -1,394 | 0,0997         | -1,417 | 0,0384          | -1,527 |
| <b>RAF_UP.V1_UP</b>                       | 0,1843       | -1,268 | 0,0443        | -1,526 | 0,2287        | -1,182   | 0,1349        | -1,284 | 0,1130         | -1,400 | 0,0388          | -1,523 |
| IL21_UP.V1_DN                             | 0,3994       | -1,107 | 0,0174        | -1,725 | 0,2362        | -1,173   | 0,0692        | -1,384 | 0,0844         | -1,497 | 0,0395          | -1,518 |
| CRX_DN.V1_DN                              | 0,2372       | -1,230 | 0,1609        | -1,276 | 0,0299        | -1,581   | 0,0189        | -1,620 | 0,0963         | -1,440 | 0,0400          | -1,515 |
| ESC_J1_UP.LATE.V1_UP                      | 0,2435       | -1,215 | 0,0208        | -1,679 | 0,0844        | -1,357   | 0,0269        | -1,565 | 0,1288         | -1,383 | 0,0398          | -1,511 |
| BMI1_DN.V1_DN                             | 0,0527       | -1,478 | 0,0965        | -1,387 | 0,3717        | -1,080   | 0,0399        | -1,472 | 0,3093         | -1,174 | 0,0391          | -1,511 |
| RAPA_EARLY_UP.V1_DN                       | 0,4443       | -1,063 | 0,0998        | -1,382 | 0,0835        | -1,374   | 0,0183        | -1,631 | 0,3824         | -1,119 | 0,0459          | -1,491 |
| ATF2_S_UP.V1_DN                           | 0,5699       | 1,132  | 0,0288        | -1,587 | 0,1818        | -1,222   | 0,0316        | -1,525 | 0,0613         | -1,554 | 0,0516          | -1,477 |
| ALK_DN.V1_DN                              | 0,3117       | -1,167 | 0,1706        | -1,264 | 0,0062        | -1,826   | 0,0224        | -1,593 | 0,4283         | -1,080 | 0,0522          | -1,473 |
| VEGF_A_UP.V1_UP                           | 0,5055       | 1,217  | 0,1619        | -1,274 | 0,0318        | -1,557   | 0,0160        | -1,652 | 0,0992         | -1,424 | 0,0520          | -1,472 |
| LTE2_UP.V1_UP                             | 0,0089       | -1,717 | 0,0507        | -1,499 | 0,3749        | -1,080   | 0,1412        | -1,277 | 0,3856         | -1,110 | 0,0575          | -1,457 |
| PRC2_EED_UP.V1_UP                         | 0,1118       | -1,365 | 0,3139        | -1,131 | 0,0052        | -1,941   | 0,0682        | -1,387 | 0,4282         | -1,075 | 0,0585          | -1,453 |
| <b>CORDENONSI_YAP_CONSERVED_SIGNATURE</b> | 0,0000       | -2,341 | 0,4837        | -1,019 | 0,0807        | -1,369   | 0,0368        | -1,488 | 0,5638         | -0,996 | 0,0630          | -1,442 |
| RB_P130_DN.V1_UP                          | 0,0002       | -2,044 | 0,5946        | 1,029  | 0,0046        | -1,863   | 0,0275        | -1,561 | 0,3692         | -1,129 | 0,0636          | -1,438 |
| PRC2_EZH2_UP.V1_DN                        | 0,0000       | -2,132 | 0,5155        | -1,001 | 0,0294        | -1,574   | 0,5078        | -1,005 | 0,3325         | -1,152 | 0,0654          | -1,434 |
| PDGF_ERK_DN.V1_DN                         | 0,7678       | 1,001  | 0,3555        | -1,100 | 0,0076        | -1,766   | 0,0345        | -1,499 | 0,1561         | -1,328 | 0,0713          | -1,423 |
| KRAS.600.LUNG.BREAST_UP.V1_DN             | 0,6254       | -0,959 | 0,0156        | -1,739 | 0,3289        | -1,113   | 0,0213        | -1,606 | 0,0959         | -1,447 | 0,0707          | -1,421 |
| <b>CORDENONSI_YAP_CONSERVED_SIGNATURE</b> | 0,0000       | -2,381 | 0,5038        | -1,009 | 0,0941        | -1,331   | 0,0363        | -1,491 | 0,5578         | -1,000 | 0,0785          | -1,408 |
| <b>KRAS.300_UP.V1_UP</b>                  | 0,2360       | -1,227 | 0,1056        | -1,363 | 0,2785        | -1,143   | 0,0098        | -1,693 | 0,1546         | -1,320 | 0,0779          | -1,407 |
| NOTCH_DN.V1_UP                            | 0,3294       | -1,149 | 0,0232        | -1,646 | 0,7119        | -0,917   | 0,1222        | -1,303 | 0,2643         | -1,208 | 0,0824          | -1,397 |
| PRC2_SUZ12_UP.V1_UP                       | 0,5094       | -1,028 | 0,0646        | -1,471 | 0,1330        | -1,276   | 0,2112        | -1,201 | 0,1882         | -1,276 | 0,0849          | -1,393 |
| PTEN_DN.V1_UP                             | 0,1069       | -1,375 | 0,1680        | -1,267 | 0,2356        | -1,175   | 0,1326        | -1,290 | 0,0970         | -1,442 | 0,0835          | -1,392 |
| ATM_DN.V1_UP                              | 0,8077       | 0,902  | 0,0455        | -1,519 | 0,0723        | -1,410   | 0,0479        | -1,441 | 0,0975         | -1,435 | 0,0859          | -1,387 |
| <b>BCAT.100_UP.V1_UP</b>                  | 0,4274       | -1,081 | 0,1441        | -1,298 | 0,0722        | -1,409   | 0,1548        | -1,262 | 0,1264         | -1,383 | 0,0863          | -1,384 |
| <b>EGFR_UP.V1_UP</b>                      | 0,1185       | -1,355 | 0,2986        | -1,146 | 0,1063        | -1,313   | 0,0436        | -1,458 | 0,1767         | -1,292 | 0,0879          | -1,380 |
| KRAS.LUNG_UP.V1_DN                        | 0,2586       | -1,201 | 0,1409        | -1,305 | 0,0326        | -1,558   | 0,0454        | -1,451 | 0,1759         | -1,302 | 0,0924          | -1,373 |
| PKCA_DN.V1_DN                             | 0,5148       | -1,020 | 0,2560        | -1,187 | 0,1438        | -1,260   | 0,0324        | -1,511 | 0,2990         | -1,185 | 0,1002          | -1,361 |
| BMI1_DN.V1_UP                             | 0,9215       | -0,800 | 0,2813        | -1,161 | 0,0057        | -1,986   | 0,0364        | -1,487 | 0,4927         | -1,039 | 0,0995          | -1,360 |
| LEF1_UP.V1_DN                             | 0,3966       | -1,102 | 0,0175        | -1,706 | 0,3182        | 1,311    | 0,3850        | -1,064 | 0,1746         | -1,292 | 0,1068          | -1,349 |
| PTEN_DN.V2_DN                             | 0,8153       | 0,891  | 0,1351        | -1,318 | 0,0291        | -1,588   | 0,0269        | -1,568 | 0,0822         | -1,479 | 0,1074          | -1,347 |
| AKT_UP.V1_DN                              | 0,5389       | -1,010 | 0,1002        | -1,371 | 0,0951        | -1,331   | 0,1205        | -1,310 | 0,4311         | -1,081 | 0,1136          | -1,338 |
| GCNP_SHH_UP.EARLY.V1_UP                   | 0,0002       | -2,039 | 0,3600        | -1,094 | 0,1798        | -1,222   | 0,9302        | 0,827  | 0,6629         | -0,948 | 0,1137          | -1,335 |
| SRC_UP.V1_DN                              | 0,0299       | -1,568 | 0,1864        | -1,244 | 0,9831        | 0,776    | 0,9430        | 0,795  | 0,1748         | -1,300 | 0,1126          | -1,335 |
| <b>SOS1_DOWN</b>                          | 0,4455       | -1,067 | 0,6991        | -0,909 | 0,0368        | -1,534   | 0,2193        | -1,190 | 0,7078         | -0,924 | 0,1139          | -1,332 |
| CRX_DN.V1_UP                              | 0,2396       | -1,214 | 0,1458        | -1,293 | 0,4362        | -1,041   | 0,2218        | -1,184 | 0,5010         | -1,031 | 0,1177          | -1,326 |
| JAK2_DN.V1_UP                             | 0,6640       | -0,939 | 0,0793        | -1,435 | 0,0564        | -1,454   | 0,1206        | -1,309 | 0,1816         | -1,283 | 0,1299          | -1,312 |
| HOXA9_DN.V1_DN                            | 0,0027       | -1,845 | 0,7370        | -0,892 | 0,0602        | -1,443</ |               |        |                |        |                 |        |

|                           |        |        |        |        |        |        |        |        |        |        |        |        |
|---------------------------|--------|--------|--------|--------|--------|--------|--------|--------|--------|--------|--------|--------|
| KRAS.600_UP.V1_UP_CORE    | 0,2419 | -1,218 | 0,0838 | -1,419 | 0,7892 | 1,017  | 0,0509 | -1,433 | 0,2418 | -1,226 | 0,1432 | -1,284 |
| GCNP_SHH_UP_EARLY.V1_DN   | 0,9237 | -0,811 | 0,4156 | -1,056 | 0,0785 | -1,386 | 0,2157 | -1,197 | 0,1572 | -1,325 | 0,1430 | -1,283 |
| RB_P130_DN.V1_DN          | 0,0543 | -1,471 | 0,0361 | -1,557 | 0,7848 | 1,003  | 0,5928 | -0,961 | 0,3292 | -1,152 | 0,1443 | -1,280 |
| PDGF_UP.V1_DN             | 0,5090 | -1,025 | 0,1818 | -1,250 | 0,0730 | -1,405 | 0,0666 | -1,391 | 0,1370 | -1,365 | 0,1436 | -1,280 |
| BMI1_DN_MEL18_DN.V1_DN    | 0,3144 | -1,164 | 0,3281 | -1,122 | 0,8408 | 1,027  | 0,3814 | -1,071 | 0,2747 | -1,200 | 0,1441 | -1,278 |
| KRAS.600_UP.V1_UP         | 0,2404 | -1,215 | 0,0920 | -1,400 | 0,8280 | 1,022  | 0,0475 | -1,445 | 0,2358 | -1,234 | 0,1427 | -1,278 |
| PRC1_BMI_UP.V1_DN         | 0,8347 | 0,846  | 0,0385 | -1,549 | 0,4956 | -1,015 | 0,2192 | -1,192 | 0,2380 | -1,231 | 0,1582 | -1,262 |
| ESC_J1_UP_EARLY.V1_UP     | 0,9127 | 0,777  | 0,2495 | -1,192 | 0,3484 | -1,100 | 0,0479 | -1,442 | 0,5685 | -0,993 | 0,1615 | -1,258 |
| P53_DN.V1_DN              | 0,3414 | -1,141 | 0,1327 | -1,322 | 0,8246 | -0,867 | 0,2355 | -1,165 | 0,2465 | -1,222 | 0,1599 | -1,258 |
| KRAS.PROSTATE_UP.V1_DN    | 0,0577 | -1,462 | 0,3030 | -1,141 | 0,0738 | -1,396 | 0,0850 | -1,358 | 0,1757 | -1,297 | 0,1767 | -1,242 |
| MEL18_DN.V1_DN            | 0,4299 | -1,078 | 0,1442 | -1,296 | 0,8097 | 1,003  | 0,2346 | -1,169 | 0,3899 | -1,112 | 0,1776 | -1,240 |
| ESC_V6.5_UP_LATE.V1_DN    | 0,8364 | -0,862 | 0,8104 | -0,859 | 0,0916 | -1,341 | 0,2327 | -1,173 | 0,3833 | -1,116 | 0,1794 | -1,237 |
| ESC_V6.5_UP_LATE.V1_UP    | 0,2367 | -1,225 | 0,1195 | -1,339 | 0,2391 | -1,169 | 0,0897 | -1,350 | 0,6791 | -0,939 | 0,1782 | -1,236 |
| CSR_LATE_UP.V1_DN         | 0,5882 | -0,975 | 0,0916 | -1,403 | 0,6705 | -0,940 | 0,0972 | -1,338 | 0,4764 | -1,051 | 0,2037 | -1,216 |
| PIGF_UP.V1_DN             | 0,4341 | -1,073 | 0,5823 | -0,966 | 0,0728 | -1,403 | 0,0326 | -1,526 | 0,4193 | -1,089 | 0,2035 | -1,214 |
| RB_DN.V1_DN               | 0,0332 | -1,553 | 0,5740 | -0,971 | 0,1382 | -1,268 | 0,2547 | -1,149 | 0,5366 | -1,013 | 0,2162 | -1,205 |
| IL2_UP.V1_UP              | 0,4695 | 1,269  | 0,2923 | 1,304  | 0,0095 | -1,737 | 0,0419 | -1,465 | 0,5028 | -1,032 | 0,2255 | -1,197 |
| MYC_UP.V1_DN              | 0,8424 | 0,852  | 0,0980 | -1,376 | 0,2761 | -1,146 | 0,1550 | -1,266 | 0,2080 | -1,259 | 0,2254 | -1,196 |
| KRAS.BREAST_UP.V1_UP      | 0,5127 | -1,026 | 0,3174 | 1,264  | 0,3723 | -1,076 | 0,0321 | -1,515 | 0,4135 | -1,093 | 0,2261 | -1,194 |
| NRL_DN.V1_DN              | 0,5123 | -1,023 | 0,3595 | -1,095 | 0,0624 | -1,433 | 0,6717 | -0,926 | 0,3835 | -1,110 | 0,2289 | -1,190 |
| BCAT_BILD_ET_AL_DN        | 0,9979 | -0,636 | 0,0391 | -1,540 | 0,5208 | -1,005 | 0,0588 | -1,415 | 0,3175 | -1,166 | 0,2328 | -1,187 |
| GCNP_SHH_UP_LATE.V1_UP    | 0,0000 | -2,251 | 0,9461 | -0,759 | 0,2997 | -1,130 | 0,5285 | 1,094  | 0,9832 | -0,690 | 0,2338 | -1,185 |
| ESC_V6.5_UP_EARLY.V1_UP   | 0,9708 | -0,746 | 0,0804 | -1,436 | 0,3283 | -1,112 | 0,2019 | -1,212 | 0,4248 | -1,078 | 0,2337 | -1,183 |
| KRAS.300_UP.V1_DN         | 0,6217 | -0,958 | 0,0781 | -1,431 | 0,1124 | -1,302 | 0,1701 | -1,245 | 1,0000 | 0,849  | 0,2348 | -1,181 |
| PKCA_DN.V1_UP             | 0,7678 | -0,893 | 0,0690 | -1,461 | 0,8385 | -0,858 | 0,1765 | -1,238 | 0,7083 | -0,920 | 0,2466 | -1,173 |
| STK33_SKM_UP              | 0,4030 | -1,102 | 0,0989 | -1,381 | 0,1739 | 1,392  | 0,3820 | -1,072 | 0,1521 | -1,344 | 0,2466 | -1,172 |
| BRCA1_DN.V1_DN            | 0,3709 | -1,126 | 0,2451 | -1,198 | 0,5796 | -0,981 | 0,2759 | -1,130 | 0,5412 | -1,010 | 0,2517 | -1,167 |
| MTOR_UP.N4.V1_UP          | 0,0026 | -1,840 | 0,6274 | 1,037  | 0,1383 | -1,269 | 0,2287 | -1,177 | 0,4292 | -1,083 | 0,2558 | -1,163 |
| PTEN_DN.V1_DN             | 0,2369 | -1,228 | 0,1424 | -1,306 | 0,8868 | 0,898  | 0,0538 | -1,426 | 0,3105 | -1,171 | 0,2536 | -1,163 |
| RPS14_DN.V1_DN            | 0,0000 | -2,291 | 0,3683 | 1,206  | 0,0047 | -1,878 | 0,9978 | -0,566 | 0,9870 | 0,651  | 0,2594 | -1,158 |
| IL2_UP.V1_DN              | 0,4285 | -1,082 | 0,1139 | -1,347 | 0,3783 | -1,080 | 0,3861 | -1,066 | 0,5605 | -1,001 | 0,2660 | -1,153 |
| TBK1.DN.48HRS_DN          | 0,0422 | -1,519 | 0,4774 | -1,023 | 0,9742 | -0,725 | 0,5388 | -0,991 | 0,7135 | -0,920 | 0,2840 | -1,142 |
| E2F1_UP.V1_UP             | 0,0009 | -1,929 | 0,9207 | 0,875  | 0,0530 | -1,473 | 1,0000 | -0,645 | 0,9782 | -0,714 | 0,2840 | -1,140 |
| STK33_SKM_DN              | 0,5313 | -1,009 | 0,0768 | -1,447 | 0,9565 | 0,853  | 0,5889 | -0,966 | 0,2368 | -1,236 | 0,2929 | -1,134 |
| TBK1.DF_UP                | 0,4445 | -1,066 | 0,3323 | -1,118 | 0,9729 | 0,816  | 0,2128 | -1,201 | 0,2467 | -1,120 | 0,3101 | -1,124 |
| BCAT_GDS748_UP            | 0,5114 | -1,032 | 0,1440 | -1,300 | 0,9607 | -0,754 | 0,2361 | -1,169 | 0,1775 | -1,288 | 0,3151 | -1,120 |
| IL15_UP.V1_UP             | 0,5489 | 1,148  | 0,3102 | 1,315  | 0,0268 | -1,600 | 0,1848 | -1,229 | 1,0000 | 0,896  | 0,3140 | -1,119 |
| PRC2_EED_UP.V1_UP         | 0,3993 | -1,102 | 0,1694 | -1,263 | 0,9639 | 0,811  | 0,8242 | -0,851 | 0,1732 | -1,297 | 0,3122 | -1,119 |
| MTOR_UP.V1_DN             | 0,7642 | 0,959  | 0,1702 | -1,261 | 0,6781 | -0,933 | 0,2201 | -1,184 | 0,6060 | -0,972 | 0,3294 | -1,109 |
| TGFB_UP.V1_UP             | 0,7121 | 1,035  | 0,4047 | -1,065 | 0,0506 | -1,484 | 0,3866 | -1,064 | 0,3868 | -1,111 | 0,3283 | -1,108 |
| CAHOY_OUIGODENDROCUTIC    | 0,1634 | -1,289 | 0,9035 | -0,800 | 0,3647 | -1,092 | 0,2220 | -1,186 | 0,4957 | -1,037 | 0,3276 | -1,107 |
| ATF2_UP.V1_DN             | 0,7793 | 0,971  | 0,1076 | -1,359 | 0,8638 | -0,840 | 0,6833 | 0,973  | 0,3586 | -1,136 | 0,3409 | -1,100 |
| CTIP_DN.V1_UP             | 0,2575 | -1,200 | 0,4669 | -1,030 | 0,8218 | 0,968  | 0,2769 | -1,131 | 1,0000 | 0,907  | 0,3388 | -1,099 |
| DCA_UP.V1_UP              | 0,7701 | 0,941  | 0,7856 | 0,961  | 0,0819 | -1,369 | 0,4353 | -1,038 | 0,3275 | -1,159 | 0,3505 | -1,092 |
| E2F3_UP.V1_UP             | 0,0524 | -1,481 | 0,6068 | 1,053  | 0,0342 | -1,544 | 0,1512 | -1,267 | 0,6563 | -0,952 | 0,3528 | -1,090 |
| MEL18_DN.V1_UP            | 0,4423 | 1,249  | 0,3712 | -1,087 | 0,0725 | -1,401 | 0,2026 | -1,213 | 0,5099 | -1,026 | 0,4011 | -1,066 |
| STK33_DN                  | 0,1850 | -1,270 | 0,1880 | -1,244 | 0,3788 | -1,072 | 0,5858 | -0,966 | 0,3276 | -1,158 | 0,3990 | -1,065 |
| MYC_UP.V1_UP              | 0,9206 | -0,804 | 0,8570 | -0,833 | 0,1444 | -1,258 | 0,9908 | -0,735 | 0,9343 | -0,793 | 0,4172 | -1,057 |
| CRX_NRL_DN.V1_UP          | 0,7287 | 1,021  | 0,3392 | -1,113 | 0,5847 | -0,976 | 0,1350 | -1,286 | 1,0000 | 0,760  | 0,4286 | -1,051 |
| P53_DN.V1_UP              | 0,1310 | -1,335 | 0,5123 | 1,132  | 0,9494 | 0,808  | 0,1217 | -1,302 | 0,3048 | -1,180 | 0,4257 | -1,051 |
| NFE2L2.V2                 | 0,0793 | -1,418 | 0,5506 | -0,984 | 0,6789 | -0,931 | 0,6229 | 1,001  | 0,5681 | -0,991 | 0,4516 | -1,038 |
| STK33_NOMO_DN             | 0,2404 | -1,230 | 0,2018 | -1,230 | 0,2339 | -1,177 | 0,5511 | -0,983 | 0,4589 | -1,061 | 0,4582 | -1,035 |
| CTIP_DN.V1_DN             | 0,6214 | -0,957 | 0,2191 | -1,217 | 0,6729 | -0,937 | 0,4522 | -1,029 | 0,5736 | -0,988 | 0,4726 | -1,028 |
| PRC2_EZH2_UP.V1_UP        | 0,8109 | 0,918  | 0,1207 | -1,335 | 0,3811 | -1,080 | 0,2560 | -1,149 | 0,3689 | -1,127 | 0,4774 | -1,025 |
| LTE2_UP.V1_DN             | 0,0091 | -1,711 | 0,0843 | -1,416 | 0,7676 | 1,100  | 0,7545 | 0,934  | 0,7899 | -0,887 | 0,5275 | -1,004 |
| KRAS.DF.V1_DN             | 0,8468 | 0,860  | 0,6305 | -0,941 | 0,1564 | -1,246 | 0,2151 | -1,196 | 0,8549 | -0,852 | 0,5378 | -0,998 |
| KRAS.50_UP.V1_UP          | 0,5552 | -0,999 | 0,3867 | -1,078 | 0,8550 | 0,926  | 0,2788 | -1,131 | 0,8903 | 1,076  | 0,5473 | -0,993 |
| CYCLIN_D1_UP.V1_DN        | 0,3954 | -1,107 | 0,3508 | -1,103 | 0,8487 | -0,851 | 0,9853 | 0,838  | 1,0000 | 0,902  | 0,5993 | -0,973 |
| KRAS.LUNG.BREAST_UP.V1_DN | 0,7792 | 0,980  | 0,0769 | -1,444 | 0,9263 | 0,875  | 0,2230 | -1,186 | 0,4955 | -1,042 | 0,5985 | -0,972 |
| DCA_UP.V1_DN              | 0,7969 | 0,890  | 0,3931 | -1,073 | 0,5903 | -0,972 | 0,5420 | -0,988 | 0,8497 | -0,852 | 0,6168 | -0,963 |
| CAHOY_NEURONAL            | 0,5668 | -0,988 | 0,6315 | -0,939 | 0,9904 | -0,640 | 0,3133 | -1,109 | 1,0000 | 0,976  | 0,6192 | -0,961 |
| WNT_UP.V1_DN              | 0,5629 | -0,993 | 0,4618 | 1,160  | 0,0525 | -1,478 | 0,1909 | -1,223 | 0,6087 | -0,973 | 0,6292 | -0,956 |
| E2F3_UP.V1_DN             | 0,8112 | 0,910  | 0,4693 | -1,028 | 0,2231 | -1,187 | 0,7094 | -0,909 | 0,8197 | -0,872 | 0,6335 | -0,953 |
| CSR_LATE_UP.V1_UP         | 0,0000 | -2,315 | 0,3666 | 1,230  | 0,8068 | -0,878 | 1,0000 | -0,590 | 1,0000 | 0,753  | 0,6538 | -0,943 |
| CYCLIN_D1_KE_V1_DN        | 0,4407 | -1,066 | 0,3031 | -1,143 | 0,9892 | -0,674 | 0,9900 | -0,744 | 0,9783 | -0,725 | 0,6836 | -0,931 |
| MEK_UP.V1_DN              | 0,0468 | -1,502 | 0,0215 | -1,662 | 0,1385 | 1,438  | 0,4715 | 1,129  | 0,6834 | -0,939 | 0,7097 | -0,920 |
| CSR_EARLY_UP.V1_DN        | 0,7351 | 1,037  | 0,0348 | -1,564 | 0,6767 | 1,141  | 0,5752 | 1,054  | 0,7022 | -0,928 | 0,7750 | -0,894 |
| YAP1_UP                   | 0,3704 | -1,124 | 0,2801 | -1,163 | 1,0000 | 0,749  | 0,9922 | -0,724 | 0,9595 | -0,762 | 0,8039 | -0,880 |
| TBK1.DN.48HRS_UP          | 0,3104 | -1,160 | 1,0000 | 0,717  | 0,3693 | -1,079 | 1,0000 | -0,693 | 0,9245 | -0,804 | 0,8155 | -0,873 |
| RB_P107_DN.V1_UP          | 0,0002 | -2,102 | 0,1235 | 1,459  | 0,5189 | -1,004 | 0,6170 | -0,951 | 1,0000 | 0,938  | 0,8379 | -0,861 |
| RB_DN.V1_UP               | 0,1392 | -1,318 | 0,7377 | 0,947  | 0,1966 | -1,206 | 0,2072 | -1,207 | 0,9913 | -0,637 | 0,8872 | -0,835 |
| EIF4_UP                   | 0,6162 | -0,964 | 0,6032 | 1,035  | 0,6353 | -0,954 | 0,3837 | -1,063 | 0,9175 | -0,816 | 0,8988 | -0,826 |
| RB_P107_DN.V1_DN          | 0,1085 | -1,371 | 0,9504 | -0,742 | 1,0000 | 0,562  | 0,9994 | -0,683 | 0,8272 | -0,867 | 0,9189 | -0,811 |
| EIF4_DN                   | 0,1568 | -1,297 | 0,2313 | -1,208 | 0,9993 | 0,497  | 0,4785 | 1,135  | 1,0000 | 0,739  | 0,9158 | -0,810 |
| JNK_DN.V1_UP              | 0,9934 | -0,683 | 0,3966 | -1,070 | 0,8526 | 0,942  | 0,4341 | 1,167  | 0,9406 | -0,784 | 0,9132 | -0,808 |
| ESC_J1_UP_LATE.V1_DN      | 0,9122 | 0,792  | 0,8972 | -0,808 | 0,5857 | -0,977 | 0,8143 | -0,864 | 0,9828 | -0,728 | 0,9139 | -0,803 |
| VEGF_A_UP.V1_DN           | 0,0000 | -2,294 | 0,5083 | -1,005 | 0,8446 | 1,034  | 0,3928 | 1,231  | 0,9976 | 0,846  | 0,9112 | -0,801 |
| CSR_EARLY_UP.V1_UP        | 0,2550 | -1,200 | 0,9635 | -0,715 | 1,0000 | 0,733  | 0,5350 | 1,084  | 1,0000 | 0,746  | 0,9182 | -0,792 |
| EGFR_UP.V1_DN             | 0,1192 | -1,348 | 0,5886 | -0,960 | 0,7826 | 1,087  | 0,4365 | 1,087  | 0,9593 | 1,025  | 0,9298 | -0,779 |
| SIRNA_EIF4GI_UP           | 0,2672 | -1,191 | 0,5494 | -0,983 | 1,0000 | 0,670  | 0,9610 | 0,743  | 0,9798 | 0,956  | 0,9293 | -0,775 |
| PDGF_ERK_DN.V1_UP         | 0,3110 | -1,163 | 0,4405 | -1,044 | 0,9866 | 0,727  | 0,9465 | 0,776  | 0,9911 | 0,701  | 0,9741 | -0,714 |
| SIRNA_EIF4GI_DN           | 0,0026 | -1,849 | 1,0000 | 0,763  | 0,8461 | 0,936  | 0,5165 | 1,083  | 1,0000 | 0,774  | 0,9985 | -0,550 |
| GLI1_UP.V1_UP             | 0,3973 | -1,100 | 1,0000 | 0,676  | 0,8677 | 1,037  | 0,6641 | 0,973  | 1,0000 | 0,873  | 0,9999 | 0,417  |
| TBK1.DF_DN                | 0,0306 | -1,570 | 0,4433 | -1,042 | 0,8249 | 0,959  | 0,0526 | 1,505  | 1,0000 | 0,774  | 1,0000 | 0,536  |
| CAMP_UP.V1_UP             | 0,9298 | -0,789 | 0,7651 | 0,957  | 0,9504 | -0,780 | 0,9979 | 0,564  | 1,0000 | 0,716  | 1,0000 | 0,552  |
| CAMP_UP.V1_DN             | 0,7251 | -0,911 | 0,4027 | -1,064 | 0,4291 | 1,251  | 0,9390 | 0,835  |        |        |        |        |

|                               |        |       |        |        |        |        |        |        |        |        |        |       |
|-------------------------------|--------|-------|--------|--------|--------|--------|--------|--------|--------|--------|--------|-------|
| STK33_NOMO_UP                 | 0,7051 | 1,054 | 0,3560 | -1,098 | 0,5795 | 1,186  | 0,2627 | 1,299  | 0,9378 | 1,053  | 0,5899 | 1,075 |
| BCAT_GDS748_DN                | 0,9938 | 0,605 | 0,7624 | 0,948  | 0,7997 | 1,022  | 0,4595 | 1,167  | 0,6295 | 1,252  | 0,5362 | 1,105 |
| BRCA1_DN.V1_UP                | 0,4565 | 1,258 | 0,9082 | 0,867  | 0,6574 | 1,137  | 0,4163 | 1,202  | 0,8679 | 1,093  | 0,5617 | 1,110 |
| YAP1_DN                       | 0,2970 | 1,379 | 0,9986 | 0,548  | 0,9467 | -0,777 | 0,9535 | 0,803  | 0,6721 | 1,176  | 0,5967 | 1,112 |
| NRL_DN.V1_UP                  | 0,5954 | 1,155 | 1,0000 | 0,703  | 0,9442 | 0,849  | 0,4819 | 1,117  | 0,7770 | 1,125  | 0,5347 | 1,144 |
| PTEN_DN.V2_UP                 | 0,4501 | 1,291 | 0,3374 | 1,230  | 0,8203 | 0,984  | 0,4778 | 1,170  | 1,0000 | 0,976  | 0,4971 | 1,170 |
| KRAS.LUNG_UP.V1_UP            | 0,5422 | 1,194 | 0,3356 | 1,271  | 0,3692 | 1,283  | 0,3754 | -1,076 | 0,6354 | 1,171  | 0,4167 | 1,212 |
| STK33_UP                      | 0,5930 | 1,167 | 0,2652 | -1,174 | 0,1489 | 1,469  | 0,1890 | 1,352  | 0,4679 | -1,056 | 0,3727 | 1,244 |
| P53_DN.V2_UP                  | 0,2540 | 1,418 | 0,6191 | 1,069  | 0,1754 | 1,401  | 0,5871 | 1,043  | 0,9201 | 1,045  | 0,3674 | 1,263 |
| MTOR_UP.N4.V1_DN              | 0,6851 | 1,069 | 0,9109 | -0,791 | 0,1205 | 1,506  | 0,0158 | 1,696  | 0,4039 | 1,383  | 0,2320 | 1,339 |
| KRAS.600.LUNG.BREAST_UP.V1_UP | 0,6041 | 1,102 | 0,1061 | 1,502  | 0,4244 | 1,243  | 0,1198 | -1,308 | 0,5659 | 1,232  | 0,1216 | 1,435 |
| JAK2_DN.V1_DN                 | 0,0144 | 1,775 | 0,5894 | -0,962 | 0,0784 | 1,566  | 0,0406 | 1,595  | 0,6231 | 1,235  | 0,0718 | 1,508 |
| PTPN11_DOWN                   | 0,0144 | 1,712 | 0,5757 | 1,092  | 0,1485 | 1,442  | 0,0199 | 1,703  | 0,0354 | 1,692  | 0,0424 | 1,575 |
| KRAS.LUNG.BREAST_UP.V1_UP     | 0,2821 | 1,368 | 0,0142 | 1,750  | 0,0224 | 1,719  | 0,0477 | 1,525  | 0,3809 | 1,340  | 0,0501 | 1,586 |
| NS_DOWN                       | 0,0152 | 1,734 | 0,0262 | 1,758  | 0,7530 | 1,077  | 0,0429 | 1,574  | 0,0167 | 1,799  | 0,0351 | 1,660 |
| RELA_DN.V1_UP                 | 0,0288 | 1,777 | 0,0200 | 1,694  | 0,1544 | 1,450  | 0,0511 | 1,529  | 0,2562 | 1,468  | 0,0235 | 1,751 |
